# Supplementary material for: UMPred-FRL: A New Approach for Accurate Prediction of Umami Peptides Using Feature Representation Learning
Source: MDPI journal article supplement (doi:10.3390/ijms222313124), 2021-12-04
Supplement: s1 [file s1]

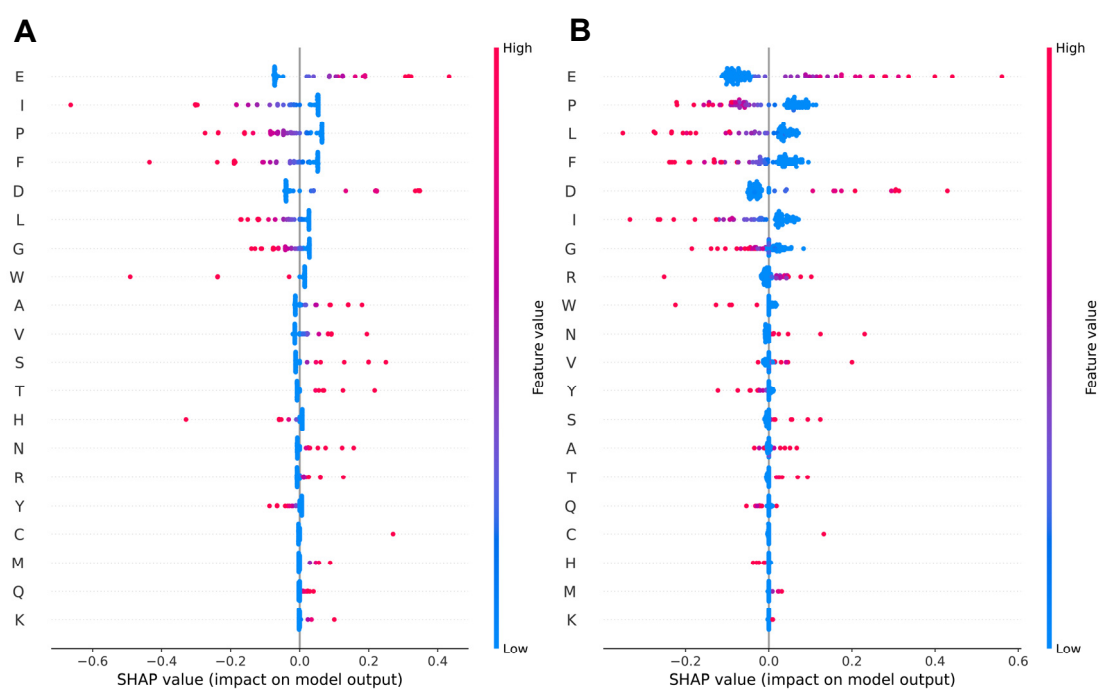

**Figure S1.** SHAP values of PLS-AAC (A) and SVM-AAC (B). SHAP values represent the directionality of the informative features, where positive and negative SHAP values represent positive (umami peptides) and negative (non-umami peptides) predictions

**Table S1.** Hyperparameter search details for five different ML classifiers.

| Method | Parameters                            | Range of parameters     |
|--------|---------------------------------------|-------------------------|
| KNN    | number of neighbours                  | Default                 |
| MLP    | hidden_layer_sizes                    | [50, 100, 300, 500]     |
| ET     | n_estimators                          | [20, 50, 100, 200, 500] |
| RF     | n_estimators                          | [20, 50, 100, 200, 500] |
|        | max_features                          | sqrt(n_features)        |
| SVM    | penalty parameter ( $C^{[a]}$ )       | [1, 2, 4, 8, 16, 32]    |
|        | kernel coefficient ( $\gamma^{[a]}$ ) | Default                 |

Columns 2 and 3 represents the parameter name used in the Scikit-learn library and the range of parameter used to develop the model, respectively.

**Table S2** Cross-validation results of different baseline models developed using six different ML algorithms and seven feature descriptors.

| Feature | Model | ACC              | BACC             | Sn               | Sp               | MCC              | AUC              |
|---------|-------|------------------|------------------|------------------|------------------|------------------|------------------|
| AAC     | ET    | 0.842<br>(0.038) | 0.818<br>(0.039) | 0.751<br>(0.045) | 0.885<br>(0.033) | 0.642<br>(0.050) | 0.904<br>(0.031) |
|         | KNN   | 0.827<br>(0.039) | 0.802<br>(0.041) | 0.732<br>(0.046) | 0.871<br>(0.035) | 0.607<br>(0.051) | 0.802<br>(0.042) |
|         | LR    | 0.834<br>(0.039) | 0.778<br>(0.038) | 0.623<br>(0.051) | 0.933<br>(0.026) | 0.605<br>(0.051) | 0.924<br>(0.028) |
|         | PLS   | 0.846<br>(0.038) | 0.804<br>(0.038) | 0.687<br>(0.048) | 0.920<br>(0.028) | 0.639<br>(0.050) | 0.919<br>(0.029) |
|         | RF    | 0.843<br>(0.038) | 0.812<br>(0.039) | 0.726<br>(0.047) | 0.898<br>(0.032) | 0.638<br>(0.050) | 0.919<br>(0.029) |
|         | SVM   | 0.856<br>(0.037) | 0.821<br>(0.038) | 0.727<br>(0.046) | 0.915<br>(0.029) | 0.665<br>(0.049) | 0.913<br>(0.029) |
| APAAC   | ET    | 0.854<br>(0.037) | 0.829<br>(0.038) | 0.762<br>(0.044) | 0.896<br>(0.032) | 0.668<br>(0.049) | 0.915<br>(0.029) |
|         | KNN   | 0.844<br>(0.038) | 0.818<br>(0.039) | 0.746<br>(0.045) | 0.889<br>(0.033) | 0.642<br>(0.050) | 0.818<br>(0.040) |
|         | LR    | 0.845<br>(0.038) | 0.809<br>(0.039) | 0.708<br>(0.047) | 0.909<br>(0.030) | 0.641<br>(0.050) | 0.914<br>(0.029) |
|         | PLS   | 0.841<br>(0.038) | 0.794<br>(0.039) | 0.666<br>(0.049) | 0.922<br>(0.028) | 0.626<br>(0.050) | 0.915<br>(0.029) |
|         | RF    | 0.855<br>(0.037) | 0.829<br>(0.038) | 0.755<br>(0.045) | 0.902<br>(0.031) | 0.669<br>(0.049) | 0.927<br>(0.027) |
|         | SVM   | 0.854<br>(0.037) | 0.818<br>(0.038) | 0.719<br>(0.047) | 0.917<br>(0.029) | 0.660<br>(0.049) | 0.917<br>(0.029) |
| CTDC    | ET    | 0.836<br>(0.039) | 0.810<br>(0.040) | 0.739<br>(0.046) | 0.881<br>(0.034) | 0.628<br>(0.050) | 0.894<br>(0.032) |
|         | KNN   | 0.824<br>(0.040) | 0.800<br>(0.041) | 0.733<br>(0.046) | 0.866<br>(0.036) | 0.602<br>(0.051) | 0.800<br>(0.042) |
|         | LR    | 0.852<br>(0.037) | 0.815<br>(0.038) | 0.715<br>(0.047) | 0.915<br>(0.029) | 0.657<br>(0.050) | 0.924<br>(0.028) |
|         | PLS   | 0.841<br>(0.038) | 0.797<br>(0.039) | 0.676<br>(0.049) | 0.918<br>(0.029) | 0.627<br>(0.050) | 0.909<br>(0.030) |
|         | RF    | 0.839<br>(0.038) | 0.809<br>(0.039) | 0.727<br>(0.046) | 0.891<br>(0.032) | 0.631<br>(0.050) | 0.912<br>(0.030) |
|         | SVM   | 0.854<br>(0.037) | 0.820<br>(0.038) | 0.727<br>(0.046) | 0.912<br>(0.030) | 0.661<br>(0.049) | 0.911<br>(0.030) |
| CTDD    | ET    | 0.847<br>(0.038) | 0.815<br>(0.039) | 0.727<br>(0.046) | 0.903<br>(0.031) | 0.648<br>(0.050) | 0.918<br>(0.029) |
|         | KNN   | 0.845<br>(0.038) | 0.806<br>(0.039) | 0.698<br>(0.048) | 0.913<br>(0.029) | 0.638<br>(0.050) | 0.806<br>(0.041) |
|         | LR    | 0.775<br>(0.044) | 0.749<br>(0.044) | 0.677<br>(0.049) | 0.821<br>(0.040) | 0.499<br>(0.052) | 0.803<br>(0.042) |

|      |     |                  |                  |                  |                  |                  |                  |
|------|-----|------------------|------------------|------------------|------------------|------------------|------------------|
|      | PLS | 0.792<br>(0.042) | 0.732<br>(0.042) | 0.567<br>(0.052) | 0.897<br>(0.032) | 0.502<br>(0.052) | 0.838<br>(0.038) |
|      | RF  | 0.853<br>(0.037) | 0.820<br>(0.038) | 0.729<br>(0.046) | 0.910<br>(0.030) | 0.659<br>(0.049) | 0.915<br>(0.029) |
|      | SVM | 0.850<br>(0.037) | 0.810<br>(0.038) | 0.700<br>(0.048) | 0.920<br>(0.028) | 0.649<br>(0.050) | 0.914<br>(0.029) |
| CTDT | ET  | 0.833<br>(0.039) | 0.789<br>(0.040) | 0.668<br>(0.049) | 0.909<br>(0.030) | 0.607<br>(0.051) | 0.877<br>(0.034) |
|      | KNN | 0.816<br>(0.040) | 0.789<br>(0.041) | 0.713<br>(0.047) | 0.864<br>(0.036) | 0.579<br>(0.052) | 0.789<br>(0.043) |
|      | LR  | 0.815<br>(0.041) | 0.764<br>(0.041) | 0.625<br>(0.050) | 0.902<br>(0.031) | 0.561<br>(0.052) | 0.855<br>(0.037) |
|      | PLS | 0.799<br>(0.042) | 0.740<br>(0.041) | 0.576<br>(0.052) | 0.903<br>(0.031) | 0.521<br>(0.052) | 0.860<br>(0.036) |
|      | RF  | 0.834<br>(0.039) | 0.787<br>(0.039) | 0.657<br>(0.050) | 0.916<br>(0.029) | 0.609<br>(0.051) | 0.893<br>(0.032) |
|      | SVM | 0.834<br>(0.039) | 0.786<br>(0.039) | 0.655<br>(0.050) | 0.917<br>(0.029) | 0.609<br>(0.051) | 0.875<br>(0.035) |
|      | ET  | 0.812<br>(0.041) | 0.743<br>(0.039) | 0.554<br>(0.052) | 0.931<br>(0.026) | 0.548<br>(0.052) | 0.876<br>(0.034) |
|      | KNN | 0.813<br>(0.041) | 0.768<br>(0.041) | 0.645<br>(0.050) | 0.891<br>(0.032) | 0.560<br>(0.052) | 0.768<br>(0.044) |
| DPC  | LR  | 0.756<br>(0.045) | 0.619<br>(0.026) | 0.242<br>(0.045) | 0.995<br>(0.008) | 0.392<br>(0.051) | 0.895<br>(0.032) |
|      | PLS | 0.836<br>(0.039) | 0.793<br>(0.039) | 0.673<br>(0.049) | 0.912<br>(0.030) | 0.615<br>(0.051) | 0.809<br>(0.041) |
|      | RF  | 0.776<br>(0.043) | 0.668<br>(0.035) | 0.371<br>(0.050) | 0.965<br>(0.019) | 0.448<br>(0.052) | 0.887<br>(0.033) |
|      | SVM | 0.812<br>(0.041) | 0.734<br>(0.038) | 0.520<br>(0.052) | 0.947<br>(0.023) | 0.549<br>(0.052) | 0.892<br>(0.032) |
|      | ET  | 0.859<br>(0.036) | 0.834<br>(0.038) | 0.765<br>(0.044) | 0.903<br>(0.031) | 0.678<br>(0.049) | 0.920<br>(0.028) |
|      | KNN | 0.837<br>(0.038) | 0.811<br>(0.040) | 0.738<br>(0.046) | 0.883<br>(0.033) | 0.629<br>(0.050) | 0.811<br>(0.041) |
|      | LR  | 0.842<br>(0.038) | 0.800<br>(0.039) | 0.685<br>(0.048) | 0.914<br>(0.029) | 0.631<br>(0.050) | 0.913<br>(0.029) |
|      | PLS | 0.836<br>(0.039) | 0.788<br>(0.039) | 0.658<br>(0.049) | 0.918<br>(0.029) | 0.614<br>(0.051) | 0.912<br>(0.030) |
| PAAC | RF  | 0.864<br>(0.036) | 0.832<br>(0.037) | 0.744<br>(0.046) | 0.920<br>(0.028) | 0.686<br>(0.048) | 0.925<br>(0.027) |
|      | SVM | 0.854<br>(0.037) | 0.818<br>(0.038) | 0.719<br>(0.047) | 0.916<br>(0.029) | 0.658<br>(0.049) | 0.919<br>(0.029) |

**Table S3** Independent test results of different baseline models developed using six different ML algorithms and seven feature descriptors.

| <b>Feature</b> | <b>Model</b> | <b>ACC</b>       | <b>BACC</b>      | <b>Sn</b>        | <b>Sp</b>        | <b>MCC</b>       | <b>AUC</b>       |
|----------------|--------------|------------------|------------------|------------------|------------------|------------------|------------------|
| AAC            | ET           | 0.854<br>(0.073) | 0.816<br>(0.075) | 0.714<br>(0.094) | 0.918<br>(0.057) | 0.653<br>(0.099) | 0.864<br>(0.071) |
|                | KNN          | 0.787<br>(0.085) | 0.748<br>(0.087) | 0.643<br>(0.100) | 0.852<br>(0.074) | 0.500<br>(0.104) | 0.748<br>(0.090) |
|                | LR           | 0.809<br>(0.082) | 0.735<br>(0.078) | 0.536<br>(0.104) | 0.934<br>(0.051) | 0.533<br>(0.104) | 0.912<br>(0.059) |
|                | PLS          | 0.820<br>(0.080) | 0.763<br>(0.079) | 0.607<br>(0.101) | 0.918<br>(0.057) | 0.565<br>(0.103) | 0.913<br>(0.059) |
|                | RF           | 0.798<br>(0.083) | 0.756<br>(0.085) | 0.643<br>(0.100) | 0.869<br>(0.070) | 0.523<br>(0.104) | 0.910<br>(0.060) |
|                | SVM          | 0.843<br>(0.076) | 0.789<br>(0.075) | 0.643<br>(0.100) | 0.934<br>(0.051) | 0.621<br>(0.101) | 0.918<br>(0.057) |
| APAAC          | ET           | 0.831<br>(0.078) | 0.780<br>(0.078) | 0.643<br>(0.100) | 0.918<br>(0.057) | 0.595<br>(0.102) | 0.868<br>(0.070) |
|                | KNN          | 0.809<br>(0.082) | 0.754<br>(0.082) | 0.607<br>(0.101) | 0.902<br>(0.062) | 0.540<br>(0.104) | 0.754<br>(0.089) |
|                | LR           | 0.820<br>(0.080) | 0.772<br>(0.081) | 0.643<br>(0.100) | 0.902<br>(0.062) | 0.570<br>(0.103) | 0.907<br>(0.060) |
|                | PLS          | 0.820<br>(0.080) | 0.753<br>(0.077) | 0.571<br>(0.103) | 0.934<br>(0.051) | 0.563<br>(0.103) | 0.901<br>(0.062) |
|                | RF           | 0.843<br>(0.076) | 0.798<br>(0.077) | 0.679<br>(0.097) | 0.918<br>(0.057) | 0.624<br>(0.101) | 0.906<br>(0.061) |
|                | SVM          | 0.831<br>(0.078) | 0.780<br>(0.078) | 0.643<br>(0.100) | 0.918<br>(0.057) | 0.595<br>(0.102) | 0.923<br>(0.055) |
| CTDC           | ET           | 0.854<br>(0.073) | 0.806<br>(0.074) | 0.679<br>(0.097) | 0.934<br>(0.051) | 0.650<br>(0.099) | 0.864<br>(0.071) |
|                | KNN          | 0.809<br>(0.082) | 0.754<br>(0.082) | 0.607<br>(0.101) | 0.902<br>(0.062) | 0.540<br>(0.104) | 0.754<br>(0.089) |
|                | LR           | 0.831<br>(0.078) | 0.771<br>(0.076) | 0.607<br>(0.101) | 0.934<br>(0.051) | 0.592<br>(0.102) | 0.907<br>(0.060) |
|                | PLS          | 0.787<br>(0.085) | 0.728<br>(0.085) | 0.571<br>(0.103) | 0.885<br>(0.066) | 0.484<br>(0.104) | 0.857<br>(0.073) |
|                | RF           | 0.820<br>(0.080) | 0.772<br>(0.081) | 0.643<br>(0.100) | 0.902<br>(0.062) | 0.570<br>(0.103) | 0.907<br>(0.060) |
|                | SVM          | 0.831<br>(0.078) | 0.780<br>(0.078) | 0.643<br>(0.100) | 0.918<br>(0.057) | 0.595<br>(0.102) | 0.923<br>(0.055) |
| CTDD           | ET           | 0.820<br>(0.080) | 0.763<br>(0.079) | 0.607<br>(0.101) | 0.918<br>(0.057) | 0.565<br>(0.103) | 0.898<br>(0.063) |
|                | KNN          | 0.798<br>(0.083) | 0.737<br>(0.082) | 0.571<br>(0.103) | 0.902<br>(0.062) | 0.509<br>(0.104) | 0.737<br>(0.092) |
|                | LR           | 0.753<br>(0.090) | 0.694<br>(0.089) | 0.536<br>(0.104) | 0.852<br>(0.074) | 0.406<br>(0.102) | 0.862<br>(0.072) |

|      |     |                  |                  |                  |                  |                  |                  |
|------|-----|------------------|------------------|------------------|------------------|------------------|------------------|
|      | PLS | 0.764<br>(0.088) | 0.712<br>(0.088) | 0.571<br>(0.103) | 0.852<br>(0.074) | 0.438<br>(0.103) | 0.757<br>(0.089) |
|      | RF  | 0.831<br>(0.078) | 0.771<br>(0.076) | 0.607<br>(0.101) | 0.934<br>(0.051) | 0.592<br>(0.102) | 0.909<br>(0.060) |
|      | SVM | 0.809<br>(0.082) | 0.764<br>(0.083) | 0.643<br>(0.100) | 0.885<br>(0.066) | 0.546<br>(0.103) | 0.894<br>(0.064) |
| CTDT | ET  | 0.798<br>(0.083) | 0.727<br>(0.080) | 0.536<br>(0.104) | 0.918<br>(0.057) | 0.505<br>(0.104) | 0.847<br>(0.075) |
|      | KNN | 0.798<br>(0.083) | 0.775<br>(0.085) | 0.714<br>(0.094) | 0.836<br>(0.077) | 0.541<br>(0.104) | 0.775<br>(0.087) |
|      | LR  | 0.809<br>(0.082) | 0.764<br>(0.083) | 0.643<br>(0.100) | 0.885<br>(0.066) | 0.546<br>(0.103) | 0.806<br>(0.082) |
|      | PLS | 0.831<br>(0.078) | 0.780<br>(0.078) | 0.643<br>(0.100) | 0.918<br>(0.057) | 0.595<br>(0.102) | 0.811<br>(0.081) |
|      | RF  | 0.798<br>(0.083) | 0.727<br>(0.080) | 0.536<br>(0.104) | 0.918<br>(0.057) | 0.505<br>(0.104) | 0.863<br>(0.072) |
|      | SVM | 0.798<br>(0.083) | 0.756<br>(0.085) | 0.643<br>(0.100) | 0.869<br>(0.070) | 0.523<br>(0.104) | 0.872<br>(0.069) |
| DPC  | ET  | 0.843<br>(0.076) | 0.789<br>(0.075) | 0.643<br>(0.100) | 0.934<br>(0.051) | 0.621<br>(0.101) | 0.897<br>(0.063) |
|      | KNN | 0.820<br>(0.080) | 0.763<br>(0.079) | 0.607<br>(0.101) | 0.918<br>(0.057) | 0.565<br>(0.103) | 0.763<br>(0.088) |
|      | LR  | 0.764<br>(0.088) | 0.625<br>(0.045) | 0.250<br>(0.090) | 1.000<br>(0.000) | 0.431<br>(0.103) | 0.885<br>(0.066) |
|      | PLS | 0.833<br>(0.077) | 0.773<br>(0.077) | 0.615<br>(0.101) | 0.931<br>(0.053) | 0.593<br>(0.102) | 0.808<br>(0.082) |
|      | RF  | 0.820<br>(0.080) | 0.724<br>(0.065) | 0.464<br>(0.104) | 0.984<br>(0.026) | 0.571<br>(0.103) | 0.899<br>(0.063) |
|      | SVM | 0.798<br>(0.083) | 0.708<br>(0.074) | 0.464<br>(0.104) | 0.951<br>(0.045) | 0.502<br>(0.104) | 0.908<br>(0.060) |
| PAAC | ET  | 0.843<br>(0.076) | 0.789<br>(0.075) | 0.643<br>(0.100) | 0.934<br>(0.051) | 0.621<br>(0.101) | 0.867<br>(0.070) |
|      | KNN | 0.831<br>(0.078) | 0.780<br>(0.078) | 0.643<br>(0.100) | 0.918<br>(0.057) | 0.595<br>(0.102) | 0.780<br>(0.086) |
|      | LR  | 0.831<br>(0.078) | 0.780<br>(0.078) | 0.643<br>(0.100) | 0.918<br>(0.057) | 0.595<br>(0.102) | 0.904<br>(0.061) |
|      | PLS | 0.798<br>(0.083) | 0.727<br>(0.080) | 0.536<br>(0.104) | 0.918<br>(0.057) | 0.505<br>(0.104) | 0.899<br>(0.063) |
|      | RF  | 0.820<br>(0.080) | 0.753<br>(0.077) | 0.571<br>(0.103) | 0.934<br>(0.051) | 0.563<br>(0.103) | 0.912<br>(0.059) |
|      | SVM | 0.820<br>(0.080) | 0.763<br>(0.079) | 0.607<br>(0.101) | 0.918<br>(0.057) | 0.565<br>(0.103) | 0.924<br>(0.055) |
